# Supplementary material for: Co-expression of MET and CD47 is a novel prognosticator for survival of luminal-type breast cancer patients
Source: PubMed Central journal article supplement (PMC4226673; doi:10.18632/oncotarget.2385), 2014-09-02
Supplement: oncotarget-05-8147-s001.pdf [file oncotarget-05-8147-s001.pdf]

## SUPPLEMENTARY FIGURE AND TABLES

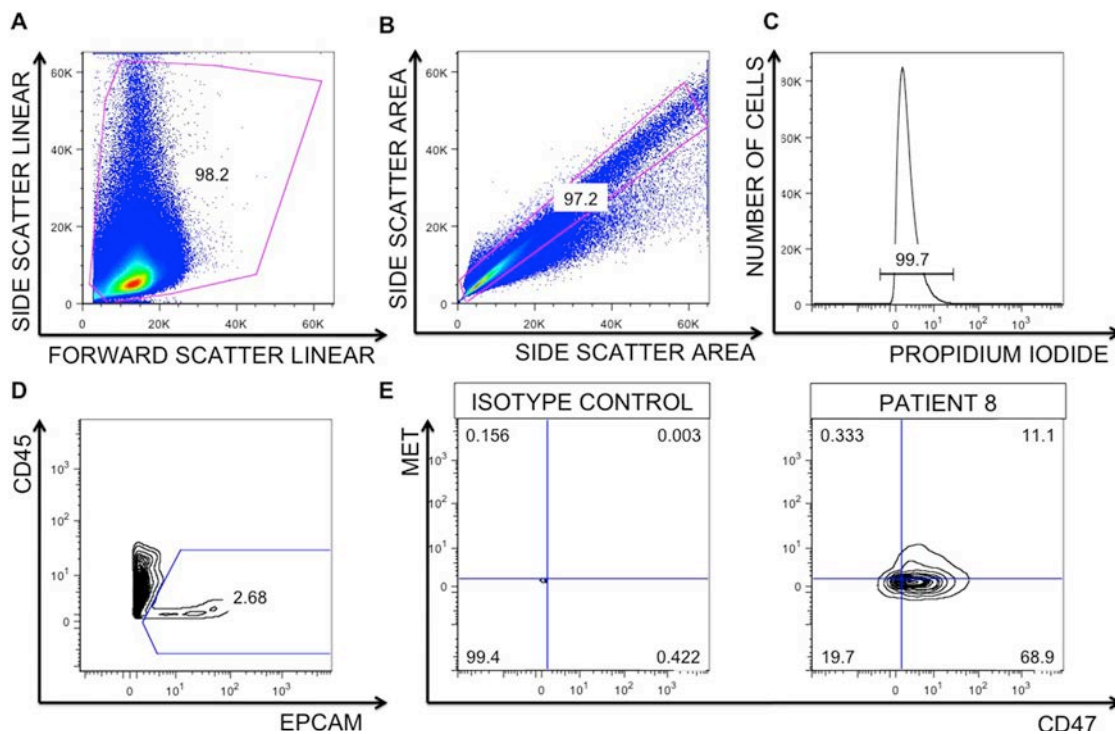

**Supplementary Figure S1: Example of patient CTC profiling by flow cytometry for CD47 and MET co-expression.** (A) Gating strategy to select cells (B) as singlets, and (C) as living cells (propidium iodide negative). (D) Gating strategy to select EPCAM<sup>+</sup>CD45<sup>-</sup> CTCs. (E) Staining of CD47 and MET using an isotype control (left) or using specific antibodies (right) on CTCs from patient 8. Abbreviations: CTC: circulating tumor cell (defined here as PI<sup>-</sup>CD45<sup>-</sup>EPCAM<sup>+</sup> cells).

**Supplementary Table S1. Number of patients at risk (in reference to 1D, E and F)**

| Months | MET <sup>-</sup> | MET <sup>+</sup> | CD47 <sup>-</sup> | CD47 <sup>+</sup> | MET <sup>-</sup> CD47 <sup>-</sup> | MET <sup>+</sup> or CD47 <sup>+</sup> | MET <sup>+</sup> and CD47 <sup>+</sup> |
|--------|------------------|------------------|-------------------|-------------------|------------------------------------|---------------------------------------|----------------------------------------|
| 0      | 56               | 199              | 230               | 13                | 141                                | 96                                    | 6                                      |
| 6      | 55               | 198              | 230               | 13                | 140                                | 95                                    | 5                                      |
| 12     | 55               | 196              | 227               | 13                | 140                                | 93                                    | 5                                      |
| 24     | 55               | 193              | 224               | 13                | 140                                | 91                                    | 5                                      |
| 36     | 55               | 187              | 219               | 13                | 138                                | 88                                    | 5                                      |
| 48     | 53               | 177              | 208               | 13                | 133                                | 82                                    | 5                                      |
| 60     | 50               | 142              | 173               | 12                | 116                                | 62                                    | 5                                      |
| 72     | 48               | 115              | 148               | 11                | 109                                | 44                                    | 3                                      |
| 84     | 47               | 107              | 143               | 5                 | 105                                | 40                                    | 2                                      |
| 96     | 46               | 104              | 139               | 4                 | 102                                | 40                                    | 1                                      |
| 108    | 46               | 98               | 134               | 3                 | 98                                 | 38                                    | 1                                      |
| 120    | 46               | 90               | 126               | 3                 | 94                                 | 33                                    | 1                                      |
| 132    | 46               | 86               | 123               | 3                 | 92                                 | 32                                    | 1                                      |
| 144    | 46               | 79               | 117               | 2                 | 88                                 | 30                                    | 0                                      |
| 156    | 42               | 71               | 106               | 1                 | 84                                 | 23                                    | 0                                      |
| 168    | 30               | 44               | 69                | 0                 | 62                                 | 6                                     | 0                                      |
| 180    | 26               | 31               | 54                | 0                 | 53                                 | 1                                     | 0                                      |
| 192    | 21               | 25               | 43                | 0                 | 42                                 | 1                                     | 0                                      |
| 204    | 12               | 15               | 24                | 0                 | 24                                 | 0                                     | 0                                      |
| 216    | 8                | 11               | 17                | 0                 | 17                                 | 0                                     | 0                                      |
| 228    | 7                | 9                | 14                | 0                 | 15                                 | 0                                     | 0                                      |
| 240    | 7                | 6                | 10                | 0                 | 11                                 | 0                                     | 0                                      |
| 252    | 6                | 6                | 10                | 0                 | 10                                 | 0                                     | 0                                      |
| 264    | 6                | 6                | 10                | 0                 | 10                                 | 0                                     | 0                                      |
| 276    | 2                | 1                | 2                 | 0                 | 2                                  | 0                                     | 0                                      |
| 288    | 2                | 1                | 1                 | 0                 | 1                                  | 0                                     | 0                                      |
| 300    | 0                | 0                | 0                 | 0                 | 0                                  | 0                                     | 0                                      |

**Supplementary Table S2. Numbers of metastatic sites as well as bulk and MET<sup>+</sup>CD47<sup>+</sup> CTCs of hormonal receptor positive breast cancer patients as determined by flow cytometry. CTCs are defined here as PI-CD45-EPCAM<sup>+</sup> cells by flow cytometry. Data are calculated based on the analysis reported in [41] and are the basis for Figure 2.**

| Patient #       | Age at diagnose of metastasis        | Age at CTC screening        | Number of metastatic sites        | CTCs/7.5mL blood by FACS (PI-CD45-EPCAM <sup>+</sup> )      | MET <sup>+</sup> CD47 <sup>+</sup> CTCs/7.5mL blood (FACS)     |
|-----------------|--------------------------------------|-----------------------------|-----------------------------------|-------------------------------------------------------------|----------------------------------------------------------------|
| 1               | 58                                   | 59                          | 3                                 | 6330                                                        | 2108                                                           |
| 3               | 58                                   | 62                          | 3                                 | 66                                                          | 20                                                             |
| 4 <sup>a</sup>  | 47                                   | 48                          | 2                                 | 268                                                         | 12                                                             |
| 5               | 38                                   | 41                          | 2                                 | 54                                                          | 7                                                              |
| 6 <sup>a</sup>  | 34                                   | 34                          | 2                                 | 53                                                          | 5                                                              |
| 8               | 41                                   | 44                          | 4                                 | 125                                                         | 14                                                             |
| 9 <sup>a</sup>  | 48                                   | 52                          | 3                                 | 383                                                         | 3                                                              |
| 10 <sup>a</sup> | 66                                   | 69                          | 3                                 | 2097                                                        | 250                                                            |
|                 | <b>Age at diagnose of metastasis</b> | <b>Age at CTC screening</b> | <b>Number of metastatic sites</b> | <b>CTCs/7.5mL blood by FACS (PI-CD45-EPCAM<sup>+</sup>)</b> | <b>MET<sup>+</sup>CD47<sup>+</sup> CTCs/7.5mL blood (FACS)</b> |
| <b>MEDIAN</b>   | 48                                   | 50                          | 3                                 | 196                                                         | 13                                                             |
